# Supplementary material for: Crystallization of paracetamol from mixtures of ethanol and water in a planar oscillatory flow crystallizer: effect of the oscillation conditions on the crystal growth kinetics
Source: Royal Society of Chemistry journal article supplement (doi:10.1039/d1ce00858g), 2021-01-01
Supplement: d1ce00858g1.pdf [file d1ce00858g1.pdf]

## Electronic Supplementary Information

Crystallization of paracetamol from mixtures of ethanol and water in  
a planar oscillatory flow crystallizer: effect of the oscillation  
conditions on the crystal growth kinetics

*Patrícia Cruz, Fernando Rocha and António Ferreira\**

LEPABE – Laboratory for Process Engineering, Environment, Biotechnology and Energy, Faculty  
of Engineering, University of Porto, Rua Dr. Roberto Frias, 4200-465 Porto, Portugal

Email: antonio@fe.up.pt

## Calibration Curves for the Concentration of Paracetamol in a 40% (v/v) Mixture of Ethanol and Water

The linear regression equation, variables and parameters for each calibration curve are presented in **Table S.1**. Five validation parameters were used to validate each calibration curve: linearity, precision, accuracy, limit of detection and limit of quantitation. The methodology used to assess each validation parameter is presented in **Table S.2** and the result for each validation parameter is presented in **Table S.3**.

**Table S.1** – Linear regression: equation, variables and parameters.

| <b>Linear regression equation:</b> $y = (a \pm ts_a)x + (b + ts_b)$ |                                                                            |                                                  |                  |                  |                  |                  |                  |
|---------------------------------------------------------------------|----------------------------------------------------------------------------|--------------------------------------------------|------------------|------------------|------------------|------------------|------------------|
| <b>Variable</b>                                                     | <b>Definition</b>                                                          |                                                  |                  |                  |                  |                  |                  |
| $y$                                                                 | Dependent variable: absorbance ( $Abs$ )                                   |                                                  |                  |                  |                  |                  |                  |
| $x$                                                                 | Independent variable: concentration of paracetamol ( $C$ ) in $g\ kg^{-1}$ |                                                  |                  |                  |                  |                  |                  |
| <b>Parameter</b>                                                    | <b>Definition</b>                                                          | <b>Value</b>                                     |                  |                  |                  |                  |                  |
|                                                                     |                                                                            | $T=10\ ^\circ C$                                 | $T=15\ ^\circ C$ | $T=20\ ^\circ C$ | $T=25\ ^\circ C$ | $T=30\ ^\circ C$ | $T=35\ ^\circ C$ |
| $n$                                                                 | Number of calibration points                                               | 6                                                | 6                | 6                | 6                | 6                | 6                |
| $a$                                                                 | Slope ( $kg\ g^{-1}$ )                                                     | 0.00236                                          | 0.00250          | 0.00232          | 0.00249          | 0.00241          | 0.00231          |
| $b$                                                                 | Intercept                                                                  | -0.001                                           | 0.003            | -0.001           | 0.001            | 0.002            | 0.01             |
| $t$                                                                 | t-statistic for $n - 2$ degrees of freedom                                 | 2.7764 with a significance level $\alpha = 0.05$ |                  |                  |                  |                  |                  |
| $s_a$                                                               | Standard deviation of the slope ( $kg\ g^{-1}$ )                           | 0.00003                                          | 0.00003          | 0.00003          | 0.00004          | 0.00002          | 0.00005          |
| $s_b$                                                               | Standard deviation of the intercept                                        | 0.002                                            | 0.002            | 0.002            | 0.004            | 0.003            | 0.01             |
| $ts_a$                                                              | Confidence interval of $a$ ( $kg\ g^{-1}$ )                                | 0.00009                                          | 0.00008          | 0.00007          | 0.00012          | 0.00007          | 0.00013          |
| $ts_b$                                                              | Confidence interval of $b$                                                 | 0.005                                            | 0.005            | 0.007            | 0.011            | 0.008            | 0.02             |

**Table S.2** – Methodology used to assess each validation parameter

| <b>Parameter</b>             | <b>Methodology</b>                                                                                                                                                                                                                                                                                                                                                                                                                                                                                                                        |
|------------------------------|-------------------------------------------------------------------------------------------------------------------------------------------------------------------------------------------------------------------------------------------------------------------------------------------------------------------------------------------------------------------------------------------------------------------------------------------------------------------------------------------------------------------------------------------|
| <b>Linearity</b>             | Linearity was assessed based on the coefficient of determination ( $R^2$ ) and the statistical significance of $a$ and $b$ . $R^2 > 0.995$ is generally considered as evidence of acceptable linearity. In addition, $a$ should differ statistically and significantly from 0, whilst $b$ should not differ statistically and significantly from 0. Therefore, the t-statistics of $a$ ( $t_a$ ) should be higher than the critical value ( $t_{crit} = 2.7764$ ) and the t-statistics of $b$ ( $t_b$ ) should be lower than $t_{crit}$ . |
| <b>Precision</b>             | Precision was assessed based on repeatability. The concentrations of 3 replicates of 3 standard solutions of paracetamol were calculated from the calibration curve. The average coefficient of variation of the three series ( $CV_{rep}$ ) was calculated to express precision.                                                                                                                                                                                                                                                         |
| <b>Accuracy</b>              | Accuracy was assessed based on percent recovery ( $RE$ ), calculated as the ratio between the concentration obtained from the calibration curve and the actual concentration of a standard solution of paracetamol. The concentrations of 3 replicates of 3 standard solutions of paracetamol were calculated from the calibration curve. The average $RE$ of the three series was calculated to express accuracy.                                                                                                                        |
| <b>Limit of detection</b>    | LOD was calculated based on $s_b$ and $a$ as $LOD = 3.3s_b/a$ .                                                                                                                                                                                                                                                                                                                                                                                                                                                                           |
| <b>Limit of quantitation</b> | LOQ was calculated based on $s_b$ and $a$ as $LOQ = 10s_b/a$ .                                                                                                                                                                                                                                                                                                                                                                                                                                                                            |

**Table S.3** – Result for each validation parameter.

| Parameter                    | Result                         |                                |                                |                                |                                |                                |
|------------------------------|--------------------------------|--------------------------------|--------------------------------|--------------------------------|--------------------------------|--------------------------------|
|                              | $T=10\text{ }^{\circ}\text{C}$ | $T=15\text{ }^{\circ}\text{C}$ | $T=20\text{ }^{\circ}\text{C}$ | $T=25\text{ }^{\circ}\text{C}$ | $T=30\text{ }^{\circ}\text{C}$ | $T=35\text{ }^{\circ}\text{C}$ |
| <b>Linearity</b>             | $R^2 = 0.999$                  | $R^2 = 0.999$                  | $R^2 = 0.999$                  | $R^2 = 0.999$                  | $R^2 = 1.000$                  | $R^2 = 0.998$                  |
|                              | $t_a = 75.321$                 | $t_a = 84.318$                 | $t_a = 87.603$                 | $t_a = 57.678$                 | $t_a = 101.011$                | $t_a = 47.719$                 |
|                              | $t_b = -0.93$                  | $t_b = 1.468$                  | $t_b = -0.247$                 | $t_b = 0.364$                  | $t_b = 0.555$                  | $t_b = 1.048$                  |
| <b>Precision</b>             | $CV_{rep} = 4\%$               | $CV_{rep} = 6\%$               | $CV_{rep} = 1\%$               | $CV_{rep} = 1\%$               | $CV_{rep} = 1\%$               | $CV_{rep} = 1\%$               |
| <b>Accuracy</b>              | $RE = 100\%$                   | $RE = 101\%$                   | $RE = 100\%$                   | $RE = 100\%$                   | $RE = 101\%$                   | $RE = 100\%$                   |
| <b>Limit of detection</b>    | $LOD = 3\text{ g kg}^{-1}$     | $LOD = 2\text{ g kg}^{-1}$     | $LOD = 3\text{ g kg}^{-1}$     | $LOD = 5\text{ g kg}^{-1}$     | $LOD = 4\text{ g kg}^{-1}$     | $LOD = 8\text{ g kg}^{-1}$     |
| <b>Limit of quantitation</b> | $LOQ = 8\text{ g kg}^{-1}$     | $LOQ = 7\text{ g kg}^{-1}$     | $LOQ = 11\text{ g kg}^{-1}$    | $LOQ = 16\text{ g kg}^{-1}$    | $LOQ = 12\text{ g kg}^{-1}$    | $LOQ = 25\text{ g kg}^{-1}$    |
